# Supplementary material for: Luminescence sensing of weakly-hydrated anions in aqueous solution by self-assembled europium(iii) complexes
Source: Royal Society of Chemistry journal article supplement (doi:10.1039/c7cc00477j), 2017-01-01
Supplement: c7cc00477j1.pdf [file c7cc00477j1.pdf]

## Electronic supplementary information

### **Luminescence sensing of weakly-hydrated anions in aqueous solution by self-assembled europium(III) complexes**

Takuya Sagami,<sup>a</sup> Yuhei O. Tahara,<sup>b,c</sup> Makoto Miyata,<sup>b</sup> Hiroyuki Miyake<sup>a</sup> and Satoshi Shinoda<sup>a,\*</sup>

<sup>a</sup> Department of Chemistry, Graduate School of Science, Osaka City University, Osaka 558-8585, Japan. E-mail: shinodas@sci.osaka-cu.ac.jp, Tel: +81-6-6605-3139

<sup>b</sup> Department of Biology, Graduate School of Science, Osaka City University, Osaka, Japan

<sup>c</sup> The OCU Advanced Research Institute for Natural Science and Technology (OCARINA), Osaka City University, Osaka, Japan

## 1. Experimental

### Synthesis of ligand 2

1,4,7,10-Tetraazacyclododecane-1,4,7,10-tetraacetic acid (DOTA, 400 mg, 1.00 mmol), *O*-(7-azabenzotriazol-1-yl)-*N,N,N',N'*-tetramethyluronium hexafluorophosphate (HATU, 1.66 g, 4.4 mmol) and 1-hydroxy-7-azabenzotriazole (HOAt, 271 mg, 2.00 mmol) were dissolved in dry CH<sub>2</sub>Cl<sub>2</sub>/DMF (4:1) solvent (15 ml). The suspension was cooled to 0 °C using an ice bath and then *N,N*-diisopropylethylamine (DIPEA, 1.62 g, 12.5 mmol) was added. The mixture was stirred for 30 min under the N<sub>2</sub> atmosphere. Solid cholesterylamine (2.35 g, 6.09 mmol) was added and the solution was further stirred for 30 min at 0 °C, then stirred for 168 h at room temperature. The solution was diluted with CH<sub>2</sub>Cl<sub>2</sub> (25 ml) and washed with 1 mol/L KOH (25 ml). From the water phase, the product was extracted with CH<sub>2</sub>Cl<sub>2</sub> (10 ml × 6), and all CH<sub>2</sub>Cl<sub>2</sub> solution was combined, dried over anhydrous K<sub>2</sub>CO<sub>3</sub>, and evaporated. The crude orange solid was reprecipitated from CH<sub>2</sub>Cl<sub>2</sub>/MeOH repeatedly. Finally, the solid was washed with a small amount of pentane to yield white solid (902 mg, 0.50 mmol, 49%).

<sup>1</sup>H NMR (CDCl<sub>3</sub>, 300 MHz, 298K) δ 0.68 (s, 12H), 0.80-2.30 (m, 160H), 2.73 (s, 16H, NCH<sub>2</sub>CH<sub>2</sub>N), 3.06 (s, 8H, NCH<sub>2</sub>CO), 3.60-3.80 (m, br, 4H), 5.32 (d, 4H, *J* = 3.4 Hz), 6.77 (d, 2.4H, *J* = 8.3 Hz, amide); Anal. Calcd. for C<sub>124</sub>H<sub>208</sub>N<sub>8</sub>O<sub>4</sub>•2.3 H<sub>2</sub>O: C, 77.71; H, 11.18; N, 5.85. Found: C, 77.40 (–0.31%); H, 11.33 (+0.15%); N, 6.15 (+0.30%), HRMS (FAB, pos.): *m/z* = 1874.6403, [C<sub>124</sub>H<sub>208</sub>N<sub>8</sub>O<sub>4</sub> + H]<sup>+</sup> requires 1874.6391.

### Synthesis of [2Eu]Cl<sub>3</sub>

Suspension of ligand 2 (90 mg) and EuCl<sub>3</sub>•6H<sub>2</sub>O (0.95 equiv.) in dry EtOH (7 ml) was sealed in glass tube, followed by heating to 120 °C for 30 min under 50-120 W microwave irradiation. After removing the solvent, the residue was recrystallized from CH<sub>2</sub>Cl<sub>2</sub> / 1,4-dioxane. The obtained solid was recrystallized from CH<sub>2</sub>Cl<sub>2</sub> / CH<sub>3</sub>CN to give yellowish xerogel-like solid. When the solid was strongly-colored, it was stirred with 30 mg of activated charcoal overnight in CH<sub>2</sub>Cl<sub>2</sub> / MeOH before recrystallization.

Yield: 78%. Anal. Calcd. for C<sub>124</sub>H<sub>208</sub>Cl<sub>3</sub>EuN<sub>8</sub>O<sub>4</sub>•7H<sub>2</sub>O: C, 65.92; H, 9.90; N, 4.96. Found: C, 65.87 (–0.05%); H, 9.78 (–0.12%); N, 5.09 (+0.13%); MS (FAB, pos.): *m/z* = 2024 [M–3Cl–2H]<sup>+</sup>.

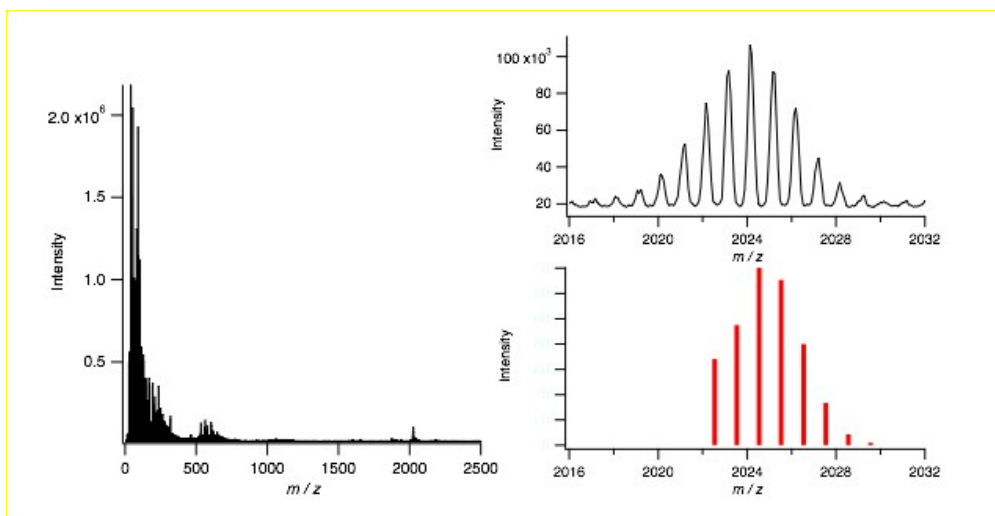

## Measurements

Negative-staining EM. The solution of  $[2\text{Eu}]\text{Cl}_3$  in 20 wt% EtOH-H<sub>2</sub>O was placed on a carbon-coated EM (200 mesh, treated with glow discharger) grid and left standing for 1 min at room temperature. The particles on the grid were negatively stained with 10  $\mu\text{l}$  of 3% La(OAc)<sub>3</sub>, dried under the incandescent lamp for 3 min after removal of excess stain with a filter paper, and observed by a transmission electron microscope (JEM1010, JEOL, Akishima, Japan) at 80 kV acceleration voltage. EM images were captured by a FastScan-F214 (T) charge-coupled device (CCD) camera (TVIPS, Gauting, Germany).

Dynamic light scattering (DLS). The solution of  $[2\text{Eu}]\text{Cl}_3$  in 20 wt% EtOH-H<sub>2</sub>O was put in a rectangular 1-cm pyrex cell. Light scattering measurements were performed at 25 °C on Malvern Zetasizer Nano ZS. Average data of 4 measurements per one sample was used.

Luminescence (phosphorescence) spectra and decay profiles were obtained with Perkin-Elmer LS-55 fluorophotometer (Xe flash lamp) at room temperature. Absorption spectra were measured on a JASCO V-670 spectrometer. Circular dichroism spectra were obtained with a JASCO J-820 spectropolarimeter. <sup>1</sup>H NMR spectra were measured with JEOL AV-300.

Microwave synthesis were done on CFM Discover Bench Mate (2450 MHz).

## 2. Luminescence lifetime measurements

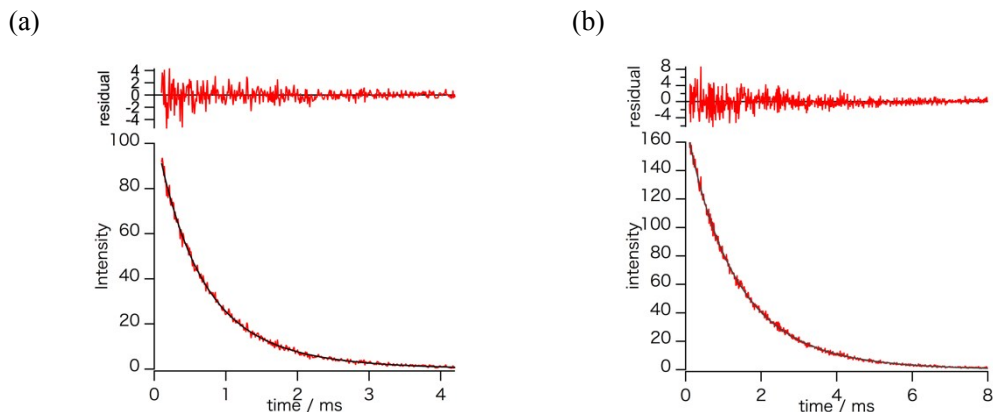

Table. Emission lifetime ( $\tau$  / ms)<sup>a</sup> and hydration number ( $q$ )

| $\tau_H$ (20 wt% EtOH-H <sub>2</sub> O) | $\tau_D$ (20 % EtOD-D <sub>2</sub> O) | $q^b$            | $q^c$            |
|-----------------------------------------|---------------------------------------|------------------|------------------|
| $0.545 \pm 0.041$                       | $1.031 \pm 0.086$                     | $0.40 \pm 0.23$  | $0.29 \pm 0.19$  |
| $1.06 \pm 0.15$                         | $1.80 \pm 0.17$                       | $-0.17 \pm 0.12$ | $-0.28 \pm 0.17$ |

**Fig. S1** Emission decay profiles and lifetimes of [2Eu]Cl<sub>3</sub> in (a) 20 wt% EtOH-H<sub>2</sub>O and (b) in 20 % EtOD-D<sub>2</sub>O solvent. [2Eu]Cl<sub>3</sub>:  $5.0 \times 10^{-5}$  M, bis-tris:  $2.5 \times 10^{-3}$  M, pH 7.0 (HCl),  $\lambda_{\text{ex}}$  = 260 nm,  $\lambda_{\text{em}}$  = 615 nm 25 °C, 1-cm quartz cell.

<sup>a</sup> Average value of 4 or 5 measurements.

<sup>b</sup> The  $q$  values were calculated using the equation<sup>#</sup>

$$q = 1.2 \times \left[ \frac{1}{\tau_H} - \frac{1}{\tau_D} - (0.25 + 0.07 \times N_{\text{amide}}) \right] \text{ in H}_2\text{O}$$

<sup>c</sup> The  $q$  values were calculated using the equation<sup>\*</sup>

$$q = 1.2 \times \left[ \frac{1}{\tau_H} - \frac{1}{\tau_D} - (0.32 + 0.075 \times N_{\text{amide}}) \right] \text{ in EtOH/H}_2\text{O} = 20/80 \text{ (v/v)}$$

, where  $N_{\text{amide}}$  is the number of amide bonds coordinating to the europium(III) center ( $N = 4$  in our system), although the solvent effect in the self-assembly does not correctly match with the one used in the estimation of the parameters in this equation.

<sup>#</sup> A. Beeby, I. M. Clarkson, R. S. Dickens, S. Faulkner, D. Parker, L. Royle, A. S. de Sousa, J. A. G. Williams and M. Woods, *J. Chem. Soc., Perkin Trans. 2*, 1999, 493.

<sup>\*</sup> P. Dissanayake, Y. Mei and M. J. Allen, *ACS Catal.*, 2011, **1**, 1203; D. J. Averill and M. J. Allen, *Inorg. Chem.*, 2014, **53**, 6257.

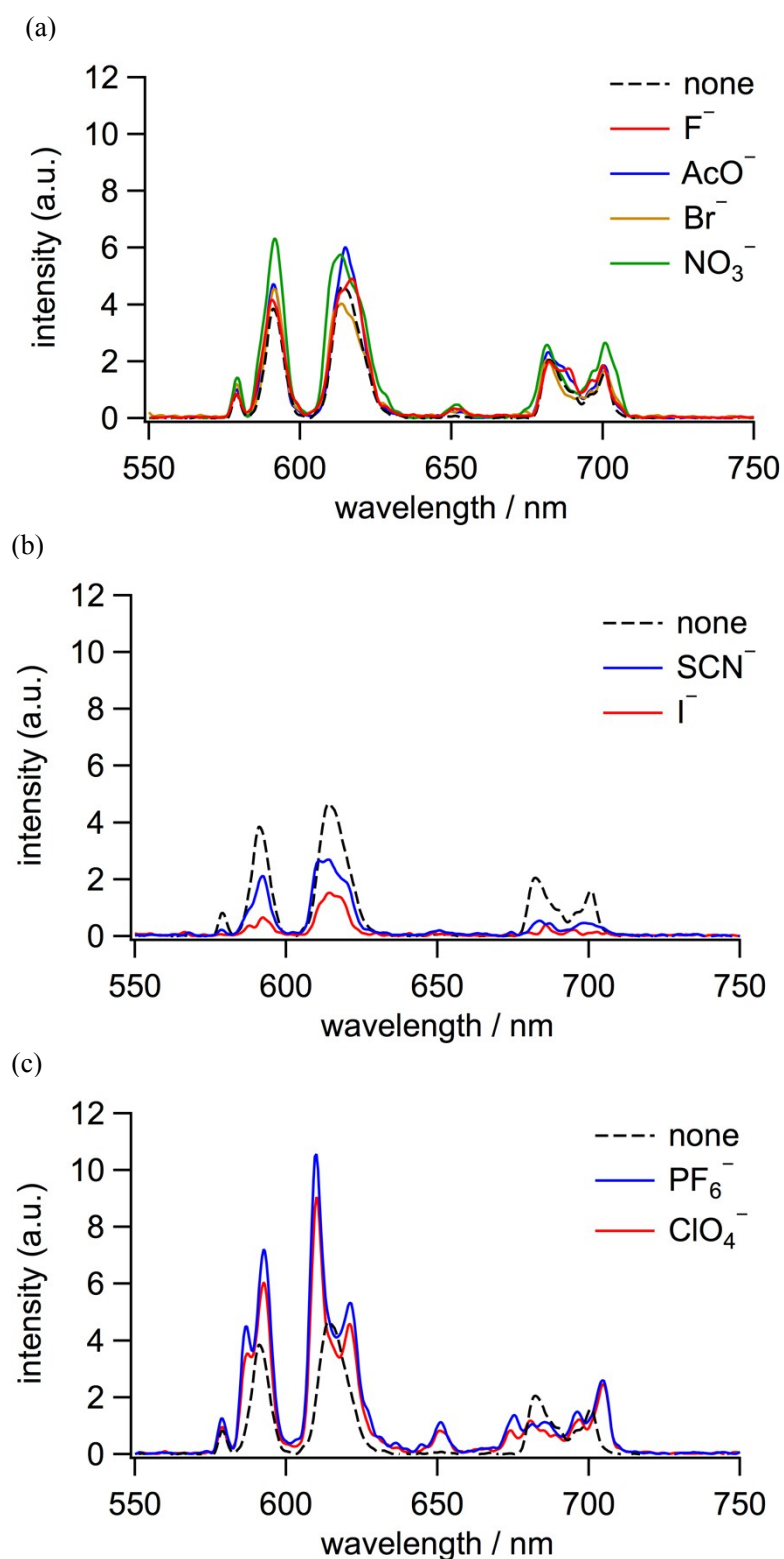

**Fig. S2** Luminescence spectra of  $[\text{2Eu}]\text{Cl}_3$  in the presence of 20 equiv. of  $\text{NaX}$  ( $\text{X}$  = anion). Black lines indicate the reference spectra without addition of anions., (a)  $\text{X} = \text{F}^-$ ,  $\text{AcO}^-$ ,  $\text{Br}^-$  and  $\text{NO}_3^-$ , (b)  $\text{X} = \text{SCN}^-$  and  $\text{I}^-$  and (c)  $\text{X} = \text{ClO}_4^-$  and  $\text{PF}_6^-$ .  $[\text{2Eu}]\text{Cl}_3$ :  $5.0 \times 10^{-5}$  M,  $[\text{NaX}]$ :  $1.0 \times 10^{-3}$  M in 20 wt% EtOH- $\text{H}_2\text{O}$  (bis-tris:  $2.5 \times 10^{-3}$  M, pH = 7.0 (HCl), 25 °C,  $\lambda_{\text{ex}} = 260$  nm, 1-cm quartz cell.

### 3. Characterization of nano particles

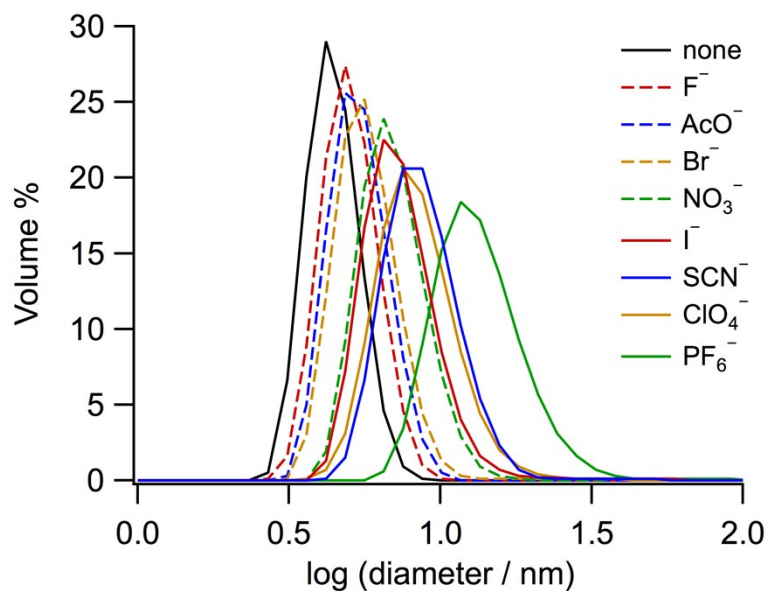

**Fig. S3** Size distribution of  $[2\text{Eu}]\text{Cl}_3$  in the presence of 20 equiv. of  $\text{NaX}$  by DLS measurements.  $\text{X} = \text{AcO}^-$ ,  $\text{Br}^-$ ,  $\text{NO}_3^-$ ,  $\text{I}^-$ ,  $\text{SCN}^-$ ,  $\text{ClO}_4^-$ , and  $\text{PF}_6^-$ .  $[2\text{Eu}]\text{Cl}_3$ :  $5.0 \times 10^{-5}$  M and  $\text{NaX}$ :  $1.0 \times 10^{-3}$  M in 20 wt% EtOH- $\text{H}_2\text{O}$  (buffer:  $2.5 \times 10^{-3}$  M bis-tris, pH 7.0 (HCl)), 25 °C, 1-cm rectangular cell.

(a)

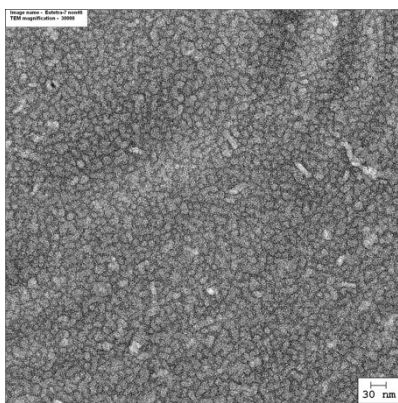

(b)

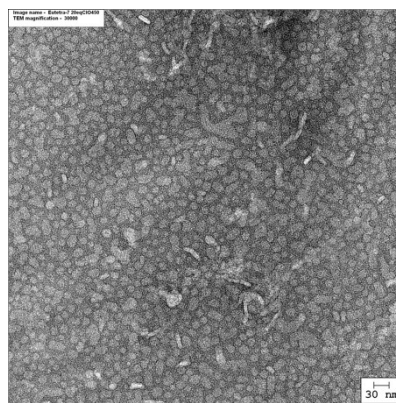

**Fig. S4** TEM image (negative staining with 3%  $\text{La}(\text{OAc})_3$  aqueous solution) of (a)  $[2\text{Eu}]\text{Cl}_3$  only and (b) in the presence of 20 equiv. of  $\text{NaClO}_4$ .  $[2\text{Eu}]\text{Cl}_3$ :  $5 \times 10^{-5}$  M and  $\text{NaClO}_4$ :  $1.0 \times 10^{-3}$  M in 20 wt% EtOH- $\text{H}_2\text{O}$  (buffer:  $2.5 \times 10^{-3}$  M bis-tris, pH 7.0 (HCl)), 25 °C.

#### 4. Induced circular dichroism of guest anions

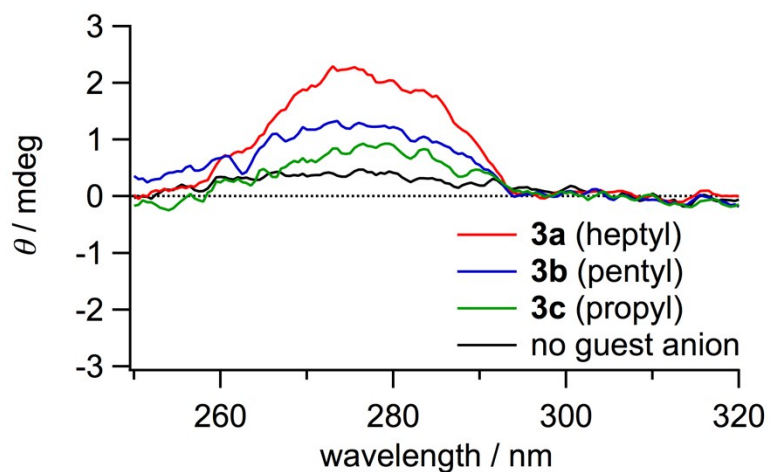

**Fig. S5** Circular dichroism spectra of [2Eu]Cl<sub>3</sub> with guest sensitizers **3a–3c**. [2Eu]Cl<sub>3</sub>:  $5.0 \times 10^{-5}$  M, [**3a–3c**]:  $5.0 \times 10^{-5}$  M in 20 wt% EtOH-H<sub>2</sub>O, bis-tris:  $2.5 \times 10^{-3}$  M, pH = 7.0 (HCl), 25 °C, 1-cm quartz cell.

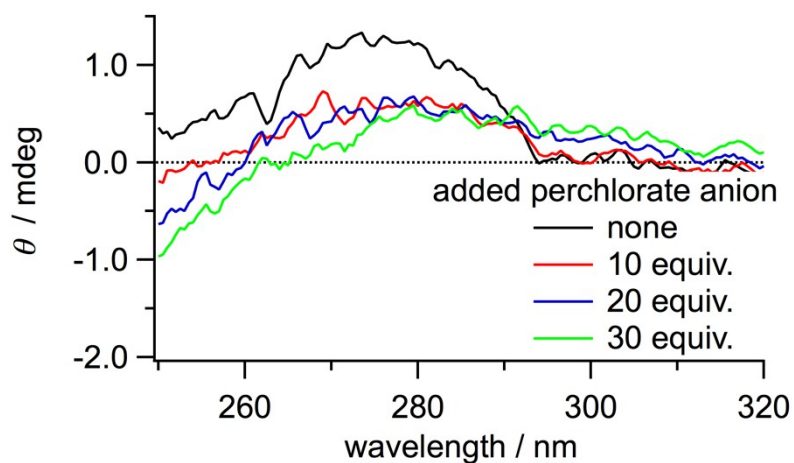

**Fig. S6** Circular dichroism spectra of [2Eu]Cl<sub>3</sub> in the presence of guest sensitizers adding 0–30 eq of NaClO<sub>4</sub>. [2Eu]Cl<sub>3</sub>:  $5.0 \times 10^{-5}$  M and sensitizer (**3b**):  $5.0 \times 10^{-5}$  M in 20 wt% EtOH-H<sub>2</sub>O (buffer:  $2.5 \times 10^{-3}$  M bis-tris, pH 7.0 (HCl)), 25 °C, 1-cm quartz cell.
